# Supplementary material for: Temperature-invariant superelastic, fatigue resistant, and binary-network structured silica nanofibrous aerogels for thermal superinsulation
Source: Royal Society of Chemistry journal article supplement (doi:10.1039/d0ta01092h), 2020-01-01
Supplement: d0ta01092h5.pdf [file d0ta01092h5.pdf]

## Supporting Information

### **Temperature-invariant superelastic, fatigue resistant, and binary-network structured silica nanofibrous aerogels for thermal superinsulation**

*Lvyue Dou<sup>a</sup>, Xiaota Cheng<sup>a</sup>, Xinxin Zhang<sup>a</sup>, Yang Si,<sup>\*a b</sup>, Jianyong Yu<sup>b</sup> and Bin Ding,<sup>\*a b</sup>*

<sup>a</sup> State Key Laboratory for Modification of Chemical Fibers and Polymer Materials, College of Textiles, Donghua University, Shanghai 201620, China

<sup>b</sup> Innovation Center for Textile Science and Technology, Donghua University, Shanghai 200051, China

\*E-mail addresses: [yangsi@dhu.edu.cn](mailto:yangsi@dhu.edu.cn) (Y. Si); [binding@dhu.edu.cn](mailto:binding@dhu.edu.cn) (B. Ding)

#### **Supporting Information contains:**

**Supplementary Methods**

**Supplementary Table S1-S2**

**Supplementary Fig. S1-S13**

## **Supplementary Methods**

### **Fabrication of flexible SiO<sub>2</sub> nanofibers**

The SiO<sub>2</sub> nanofibers were prepared by the combination of sol-gel method and electrospinning reported in our previous work.<sup>[1-2]</sup> First, SiO<sub>2</sub> precursor sol solution was prepared by mixing TEOS, H<sub>2</sub>O, EtOH, C<sub>2</sub>H<sub>2</sub>O<sub>4</sub> with a molar ratio of 1:3.57:0.71:0.016 at room temperature for 8 h. Meanwhile, a 23 wt% PVB/EtOH solution was prepared by stirring dissolving the PVB powder in EtOH at room temperature for 8 h. Subsequently, SiO<sub>2</sub> sol and PVB/EtOH solution were mixed with the mass ratio of 3:1 and stirred for another 4 h to obtain the electrospinning precursor solution. Following electrospinning process was performed by utilizing DXES-1 spinning equipment with an applied high voltage of 15 kV, receiving distance of 15 cm, and a constant feed rate of 1 mL h<sup>-1</sup>. The as-spun composite PVB/TEOS composite nanofibers were calcined at 800 °C in a muffle furnace by gradually increasing the temperature at a heating rate of 5 °C min<sup>-1</sup> to obtain SiO<sub>2</sub> nanofibers.

### **Fabrication of SNFAs**

SNFAs were prepared by freeze-drying method reported in our previous work.<sup>[2]</sup> The procedure for the preparing of SNFA with a density of 5 mg cm<sup>-3</sup> is as follows. Firstly, 1 g flexible SiO<sub>2</sub> nanofibers and 0.26 g SiO<sub>2</sub> precursor sol were uniformly dispersed in 200 g PEO solution with the content of 0.01 wt% by using high-pressure homogenizer (AH-BASIC, Shanghai Yang Yi Biotech Co., Ltd. China.). Then, the obtained fibrous dispersion was transferred to the pre-prepared molds, and frozen in liquid nitrogen bath, and then freeze-dried for 24 h to completely removing the ice crystals within the samples to obtain the unbonded polymer-assisted silica nanofibrous aerogels (PNFAs). Consequently, the PSNAs were calcined at 700 °C in a muffle furnace by gradually increasing the temperature at a heating rate of 5 °C min<sup>-1</sup> to obtain SNFAs.

### **Fabrication of BSAs with ultralow density of 1 mg cm<sup>-3</sup>**

Based on the fabrication process of SNFAs above, SNFAs with a flyweight density of 0.5 mg cm<sup>-3</sup> were fabricated. Subsequently, this SNFA was immersed into the pre-prepared MTMS-based silica sol with the mass content of MTMS 0.2 g. After the following hydrolysis-condensation, solvent exchange, APD, and calcination process, BSA with ultralow density of 1 mg cm<sup>-3</sup> was obtained. Theoretically, the density of the aerogel obtained by this method should be 0.6 mg cm<sup>-3</sup>. However, the volume shrinkage of SNFA during the immersing process resulting in the increase of density.

### Uncategorized References

- [1] H. Shan, X. Wang, F. Shi, J. Yan, J. Yu, B. Ding, *ACS Appl Mater Interfaces* **2017**, 9, 18966.
- [2] L. Dou, X. Zhang, X. Cheng, Z. Ma, X. Wang, Y. Si, J. Yu, B. Ding, *Acs Applied Materials & Interfaces* **2019**, 11, 29056.

**Table S1.** Physical properties of SNFA and BSAs.

| Sample | MTMS<br>[g] | $\rho$<br>[mg cm <sup>-3</sup> ] | Loading of granular<br>silica aerogel (%) | Porosity [%] | $S_{\text{BET}}^{\text{a}}$ [m <sup>2</sup> g <sup>-1</sup> ] | $V_{\text{pore}}$ [cm <sup>3</sup> g <sup>-1</sup> ] | $D_{\text{pore}}^{\text{b}}$ [nm] |
|--------|-------------|----------------------------------|-------------------------------------------|--------------|---------------------------------------------------------------|------------------------------------------------------|-----------------------------------|
| SNFA   | 0           | 5.05                             | 0                                         | 99.77        | 2.20                                                          | 0.0017                                               | 34.22                             |
| BSA1   | 0.2         | 5.97                             | 15.39                                     | 99.73        | 67.41                                                         | 0.0472                                               | 4.10                              |
| BSA2   | 0.5         | 7.69                             | 34.31                                     | 99.65        | 144.08                                                        | 0.0907                                               | 3.41                              |
| BSA3   | 1           | 16.53                            | 56.00                                     | 99.25        | 200.84                                                        | 0.2070                                               | 5.62                              |
| BSA4   | 2           | 29.39                            | 73.89                                     | 98.66        | 450.42                                                        | 0.5963                                               | 6.09                              |

<sup>a)</sup> Specific surface area obtained from the nitrogen adsorption–desorption isotherms using the Brunauer-Emmett-Teller equation; <sup>b)</sup> Mean pore diameter obtained from the nitrogen adsorption–desorption isotherms according to the Barrett-Joyner-Halenda method.

**Table S2.** The relevant properties of BSAs and other commonly used thermal insulators

| Materials                             | Density<br>(mg cm <sup>-3</sup> ) | Thermal<br>conductivity<br>(W m <sup>-1</sup> K <sup>-1</sup> ) | Maximum<br>working temperature<br>(°C) | Compressibility     |
|---------------------------------------|-----------------------------------|-----------------------------------------------------------------|----------------------------------------|---------------------|
| <b>HNAs</b>                           | <b>1–30</b>                       | <b>0.022 - 0.027</b>                                            | <b>1100</b>                            | <b>Superelastic</b> |
| PU foams                              | 30 – 200                          | 0.027 – 0.2                                                     | 200                                    | Elastic             |
| Glass fiber/SiO <sub>2</sub> aerogels | 50 – 300                          | 0.04 – 0.2                                                      | 800                                    | Elastic             |
| Nonwovens                             | 50 – 200                          | 0.05 – 0.3                                                      | 150                                    | Elastic             |

**Fig. S1 – S13**

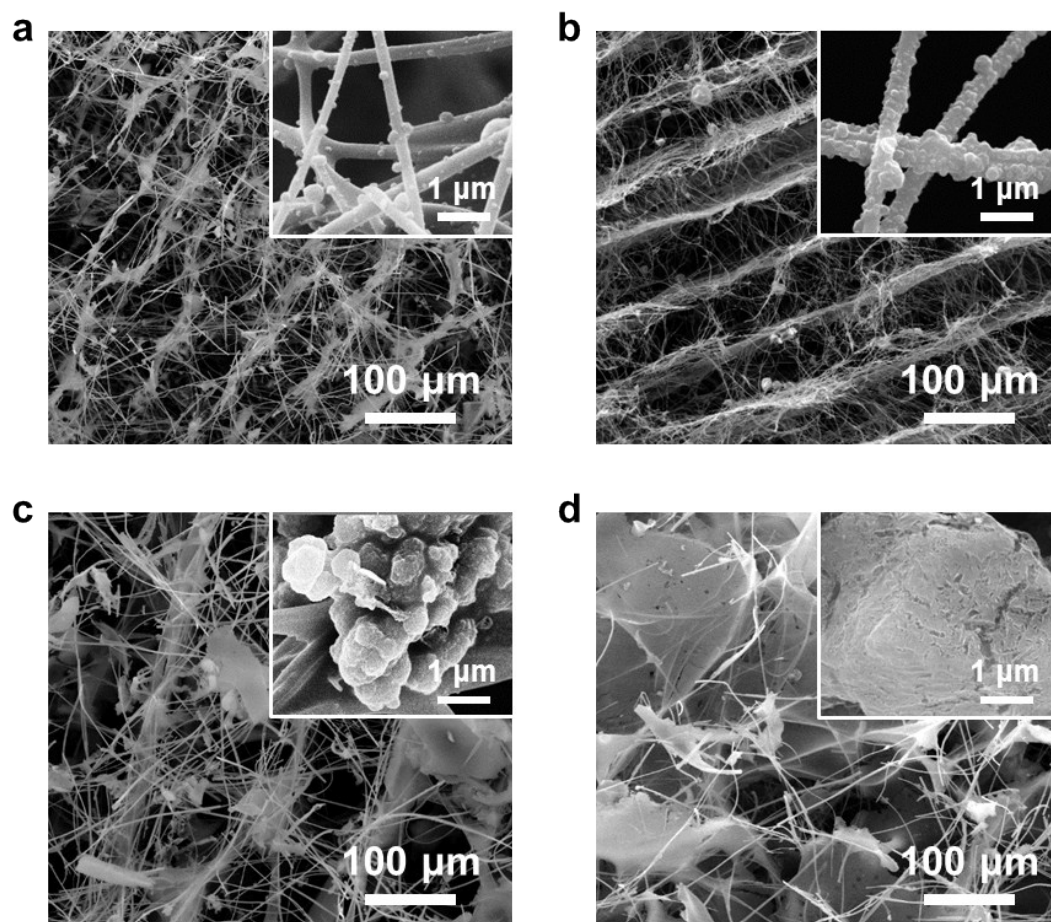

**Fig. S1** SEM images of BSA1 (a), BSA2 (b), BSA3 (c) and BSA4 (d).

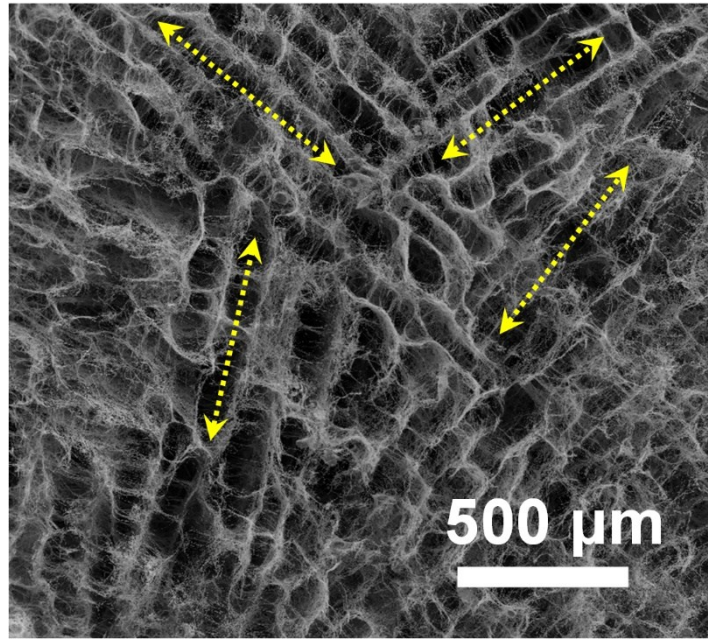

**Fig. S2** Micro-orientation and macro-isotropic structure of BSAs.

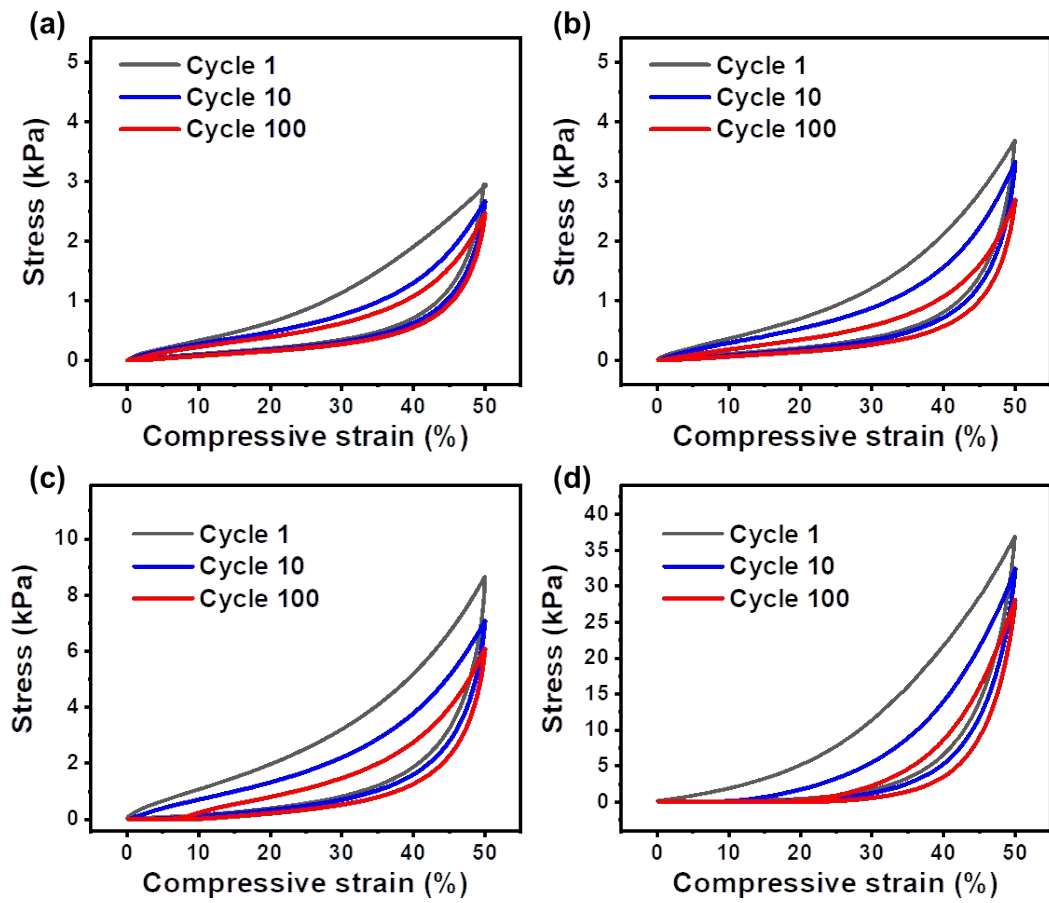

**Fig. S3** 100-cyclic compressive test of BSA1 (a), BSA2 (b), BSA3 (c), and BSA4 (d).

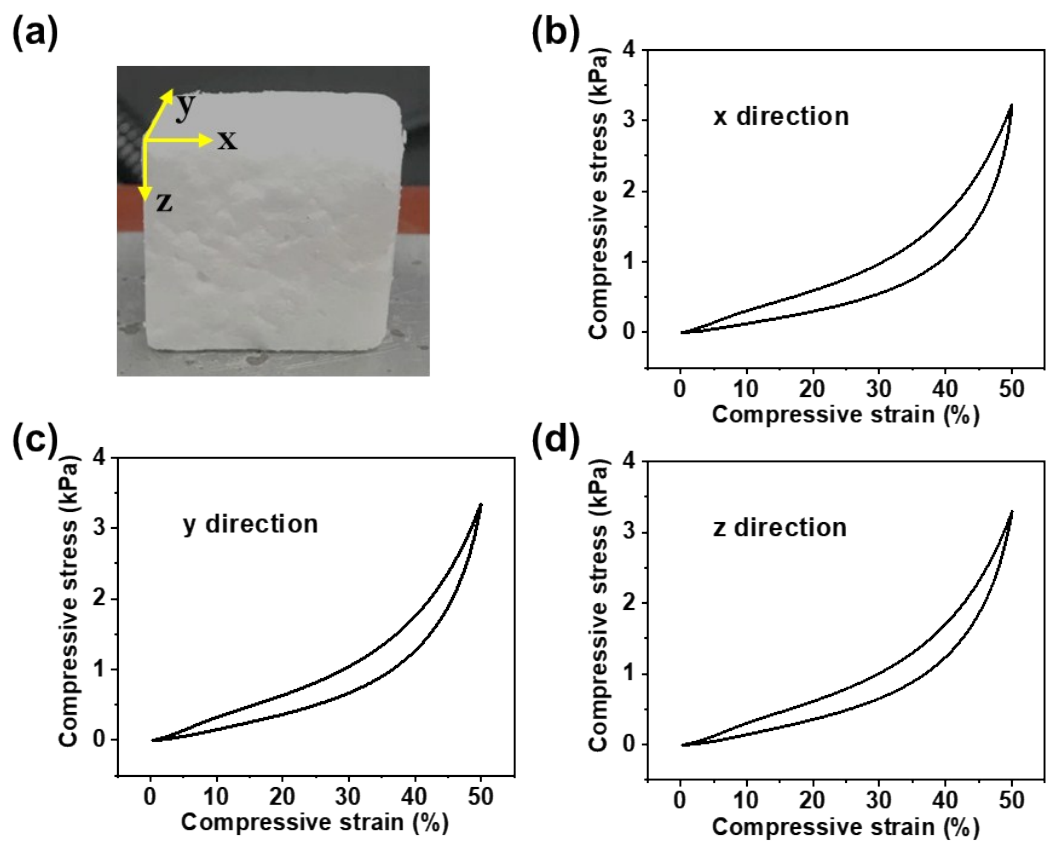

**Fig. S4** (a) Three compressing direction (x, y, and z) on a cubic BSA sample. (b-d) Compressive stress versus strain curves for BSAs under three compressing direction.



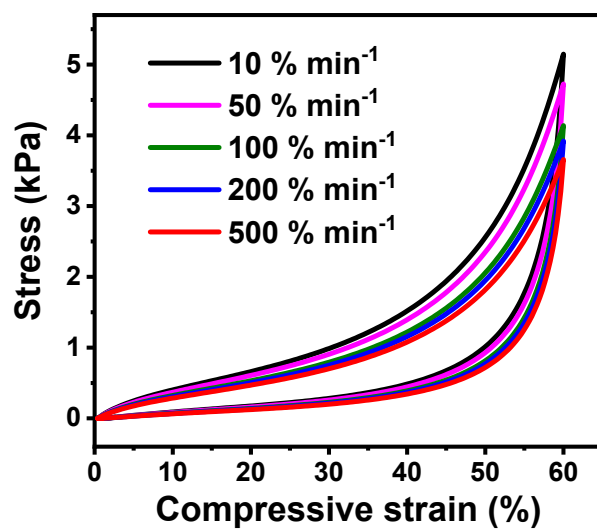

**Fig. S5** The compressive  $\sigma$ - $\epsilon$  curves of BSAs under different compressive rates ranging from 10 to 500 mm min<sup>-1</sup>.

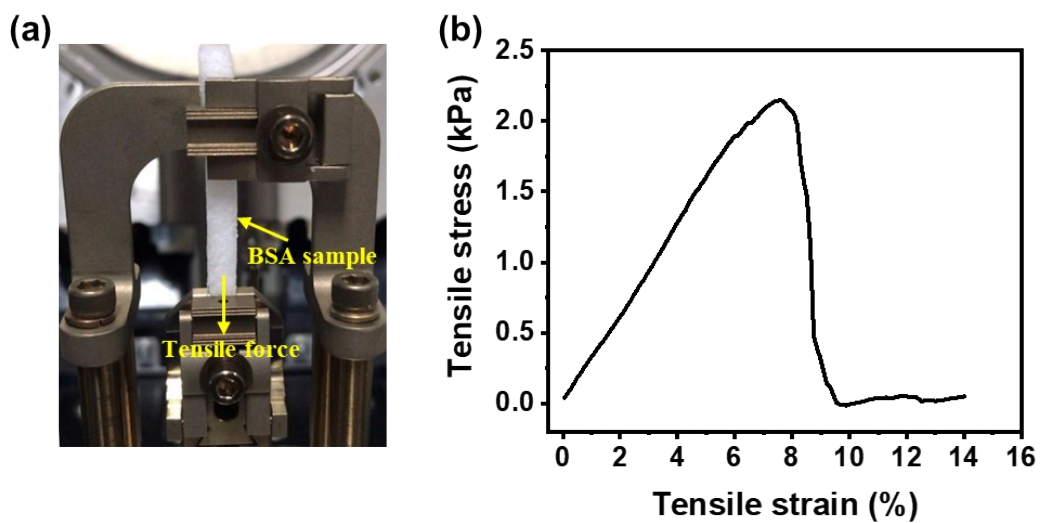

**Fig. S6** (a) The measurement of tensile mechanical property was performed by using a TA-Q850 DMA instrument with a tensile clamp. (b) Tensile  $\sigma$ - $\varepsilon$  curve of BSAs.

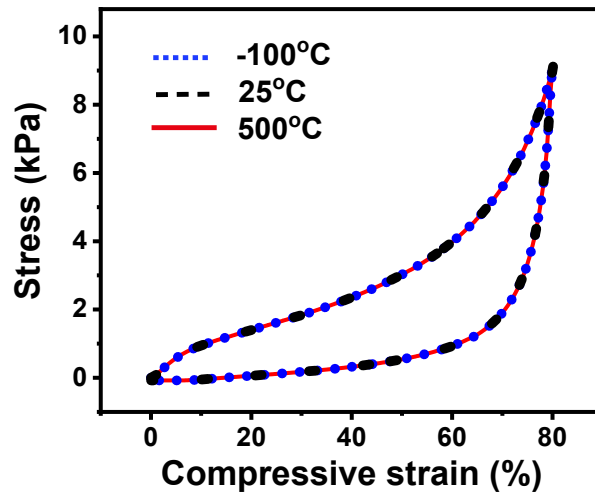

**Fig. S7** The single-cycle  $\sigma$ - $\varepsilon$  curve at  $-100^{\circ}\text{C}$  and  $500^{\circ}\text{C}$  are almost completely the same with the curve at  $25^{\circ}\text{C}$  ( $\varepsilon = 80\%$ , both along the axial direction).

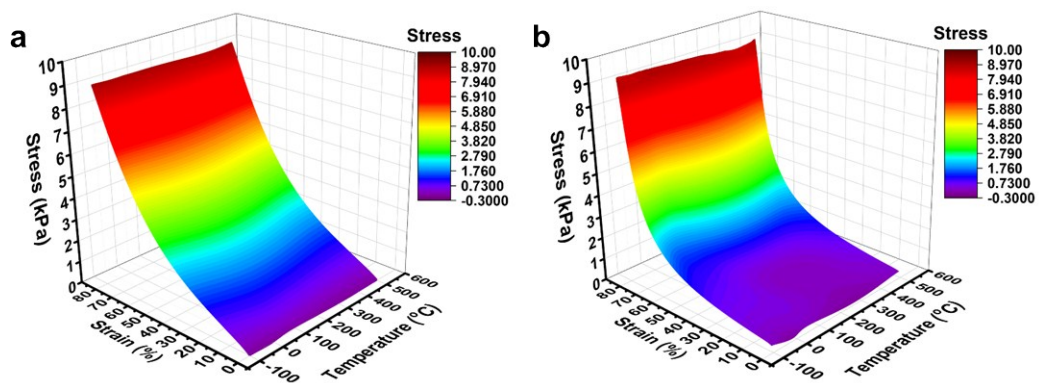

**Fig. S8** 3D surface graphs of the stress dependence on strain and temperature in the compression (a) and release(b) process of BSAs.

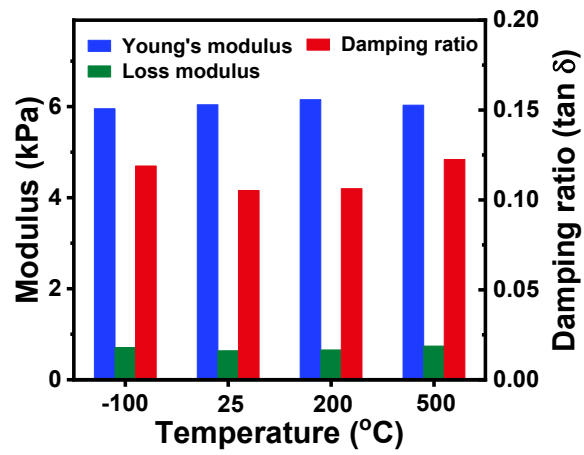

**Fig. S9** The Young's modulus, loss modulus, and damping ratio for the first cycle of BSAs ( $\varepsilon = 60\%$ ) at different temperature.

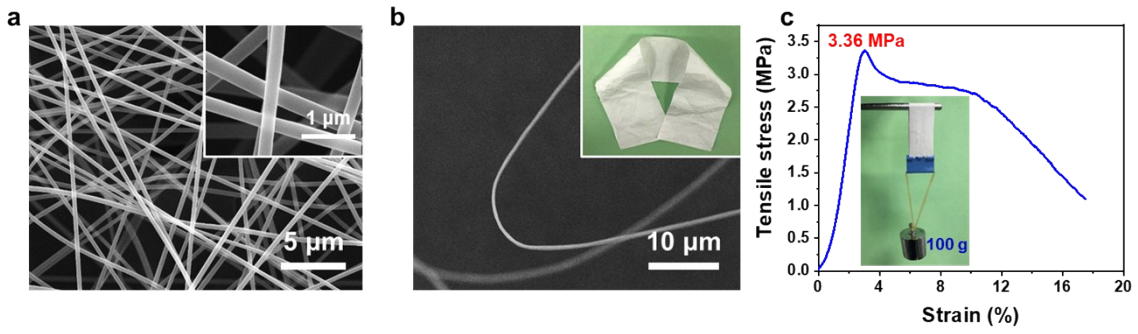

**Fig. S10** **a** SEM of silica nanofibrous membrane. **b** SEM of a single nanofiber showing the good flexibility. **c** The tensile stress–strain curve of silica nanofibrous membrane. Inset: Optical photograph of silica nanofibrous membrane showing superior stretch resistance.

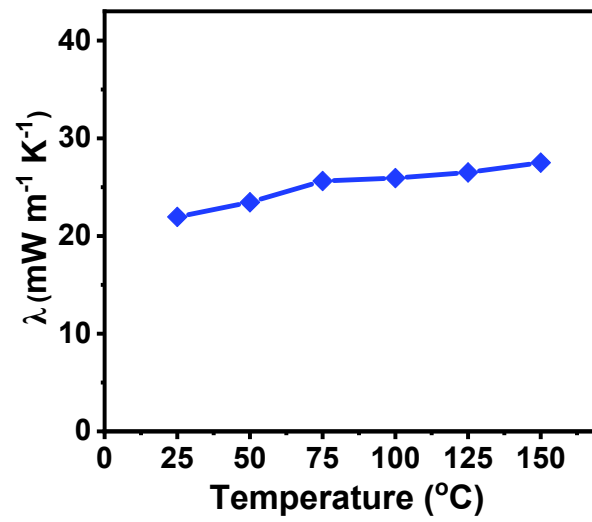

**Fig. S11** The thermal conductivities of the BSA2 at different temperature.

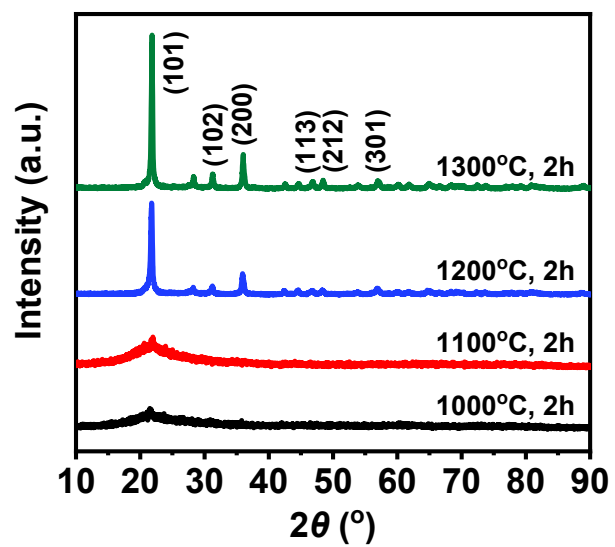

**Fig. S12** XRD patterns of BSA2 after calcined at 1000, 1100, 1200 and 1300°C for 2 h.



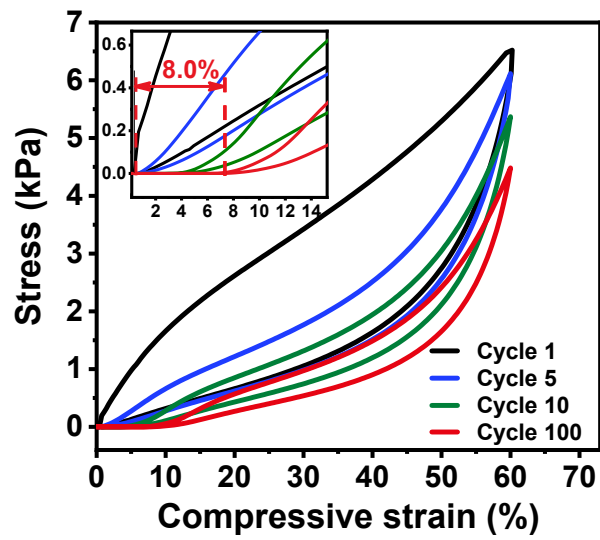

**Fig. S13** 100-cyclic compressive test of BSA2 after calcined at 1100°C for 2 h.
